# Supplementary material for: Statistical Estimation of Blast Fragmentation by Applying 3D Laser Scanning to Muck Pile
Source: Hindawi journal article supplement (doi:10.1155/2022/3757561), 2022-09-26
Supplement: f1 [file 3757561.f1.pdf]

| Laboratory experiments |            |            |               |            |            |  |
|------------------------|------------|------------|---------------|------------|------------|--|
| Scattered blocks       |            |            |               |            |            |  |
| case1                  |            |            | case2         |            |            |  |
| laser-scanner          | water-tank | desk-split | laser-scanner | water-tank | desk-split |  |
| 4                      | 4          | 3.8        | 4.1           | 4          | 3.7        |  |
| 5                      | 5          | 4.2        | 4.9           | 5          | 4.3        |  |
| 6                      | 6          | 4.8        | 5.5           | 6          | 4.8        |  |
| 8                      | 8          | 7.9        | 8             | 8          | 8.1        |  |
| 8.4                    | 8.4        | 7.3        | 8.4           | 8.4        | 8.3        |  |
| 8.8                    | 9          | 9          | 8.8           | 9          | 9.2        |  |
| 9.2                    | 9.5        | 9.5        | 9.2           | 9.5        | 9.5        |  |
| 9.8                    | 9.8        | 9.3        | 9.8           | 9.8        | 9.3        |  |
| 10.1                   | 10.1       | 9.7        | 10            | 10.1       | 9.7        |  |
| 10.5                   | 10.6       | 10.6       | 10.3          | 10.6       | 10.6       |  |
| 10.8                   | 10.8       | 9.7        | 10.5          | 10.8       | 9.7        |  |
| 11.2                   | 11.2       | 9.4        | 11.2          | 11.2       | 9.4        |  |
| 11.7                   | 11.7       | 8.7        | 11.7          | 11.7       | 8.7        |  |
| 12                     | 12         | 11         | 12            | 12         | 11         |  |
| 11.6                   | 12.4       | 12.4       | 11.6          | 12.4       | 12.4       |  |
| 12.1                   | 12.2       | 12.2       | 12.1          | 12.2       | 12.6       |  |
| 12.9                   | 12.9       | 12.6       | 12.5          | 12.9       | 12.9       |  |
| 12.2                   | 13.2       | 13.2       | 12.2          | 13.2       | 13.2       |  |
| 12.4                   | 12.5       | 12.5       | 12.4          | 12.5       | 12.5       |  |
| 12                     | 13.2       | 13.2       | 12            | 13.2       | 13.2       |  |
| 13.6                   | 13.6       | 13.5       | 13.2          | 13.6       | 13.3       |  |
| 13.5                   | 14.6       | 14.6       | 13.5          | 14.6       | 14.6       |  |
| 14                     | 14.2       | 14.2       | 14            | 14.2       | 14.2       |  |
| 14.5                   | 14.5       | 14.3       | 14.5          | 14.5       | 14.3       |  |
| 15                     | 15         | 14.8       | 15.1          | 15         | 14.5       |  |
| 16.1                   | 16         | 15.2       | 15.9          | 16         | 15.2       |  |
| 17.1                   | 17.2       | 16.2       | 17.2          | 17.2       | 16.2       |  |
| 18.1                   | 18         | 17.6       | 18.1          | 18         | 17.4       |  |
| 19.4                   | 19.4       | 18.3       | 19.4          | 19.4       | 18.3       |  |
| 22.3                   | 22.3       | 19.4       | 22.3          | 22.3       | 22.1       |  |
| 24.6                   | 24.6       | 24         | 24.6          | 24.6       | 23.7       |  |
| 26                     | 26         | 25.6       | 26.2          | 26         | 25.8       |  |

Laboratory experiments

heaped blocks

| case1-sur     |           |             |           |             |           | case2-sur     |           |             |           |             |           |
|---------------|-----------|-------------|-----------|-------------|-----------|---------------|-----------|-------------|-----------|-------------|-----------|
| laser-scanner |           | desk-split  |           | water-tank  |           | laser-scanner |           | desk-split  |           | water-tank  |           |
| diameter/cm   | passing/% | diameter/cm | passing/% | diameter/cm | passing/% | diameter/cm   | passing/% | diameter/cm | passing/% | diameter/cm | passing/% |
| 3.6           | 7.71E-04  | 3           | 0         | 5.3         | 7.71E-04  | 3.496         | 6.91E-04  | 3           | 0         | 4.2         | 5.29E-04  |
| 5.4           | 0.00337   | 6           | 0.00409   | 8.0         | 0.00337   | 4.416         | 0.00208   | 6           | 0.00409   | 6.1         | 0.00215   |
| 7.56          | 0.01051   | 9           | 0.02287   | 11.2        | 0.01051   | 6.716         | 0.00698   | 9           | 0.02287   | 9.6         | 0.00847   |
| 8.1           | 0.01928   | 12          | 0.10153   | 12.0        | 0.01928   | 7.268         | 0.01319   | 12          | 0.10153   | 10.2        | 0.01605   |
| 8.55          | 0.02961   | 15          | 0.34676   | 12.6        | 0.02961   | 8.004         | 0.02148   | 15          | 0.34676   | 10.8        | 0.02505   |
| 8.82          | 0.04094   | 18          | 0.51584   | 13.0        | 0.04094   | 8.556         | 0.03161   | 18          | 0.51584   | 11.4        | 0.03563   |
| 9.72          | 0.0561    | 21          | 0.58272   | 14.4        | 0.0561    | 8.74          | 0.0424    | 21          | 0.58272   | 11.6        | 0.04678   |
| 9.9           | 0.07213   | 24          | 0.69416   | 14.6        | 0.07213   | 8.924         | 0.05389   | 24          | 0.69416   | 11.7        | 0.05822   |
| 10.08         | 0.08904   | 27          | 1         | 14.9        | 0.08904   | 9.752         | 0.06889   | 27          | 1         | 11.9        | 0.07026   |
| 10.53         | 0.10832   | 30          |           | 15.6        | 0.10832   | 10.12         | 0.08565   |             |           | 12.8        | 0.08524   |
| 11.16         | 0.13128   |             |           | 16.5        | 0.13128   | 11.408        | 0.12965   |             |           | 13.4        | 0.10243   |
| 11.25         | 0.15479   |             |           | 16.6        | 0.15479   | 11.5          | 0.13424   |             |           | 14.6        | 0.12466   |
| 11.61         | 0.18063   |             |           | 17.2        | 0.18063   | 11.592        | 0.15543   |             |           | 14.7        | 0.14735   |
| 11.7          | 0.20708   |             |           | 17.3        | 0.20708   | 12.144        | 0.18838   |             |           | 14.8        | 0.17051   |
| 11.88         | 0.23477   |             |           | 17.6        | 0.23477   | 12.544        | 0.21734   |             |           | 15.6        | 0.19763   |
| 12.69         | 0.26852   |             |           | 18.8        | 0.26852   | 13.064        | 0.25339   |             |           | 15.8        | 0.22581   |
| 12.78         | 0.30299   |             |           | 18.9        | 0.30299   | 13.432        | 0.29258   |             |           | 16.8        | 0.25968   |
| 13.14         | 0.34046   |             |           | 19.4        | 0.34046   | 13.616        | 0.32339   |             |           | 16.9        | 0.29416   |
| 13.5          | 0.38109   |             |           | 20.0        | 0.38109   | 13.984        | 0.34761   |             |           | 17.5        | 0.33244   |
| 13.59         | 0.42254   |             |           | 20.1        | 0.42254   | 14.904        | 0.41113   |             |           | 18.6        | 0.37841   |
| 15.48         | 0.53805   |             |           | 22.9        | 0.4838    | 16.192        | 0.49978   |             |           | 20.8        | 0.44269   |
| 16.2          | 0.59402   |             |           | 24.0        | 0.55402   | 19.228        | 0.78472   |             |           | 21.7        | 0.52569   |
| 17.46         | 0.66192   |             |           | 25.8        | 0.64192   | 22.08         | 0.92877   |             |           | 22.6        | 0.56815   |
| 20.7          | 0.7884    |             |           | 30.6        | 0.7884    | 23.552        | 1         |             |           | 32          | 0.78719   |
| 25.4          | 1         |             |           | 34.6        | 1         |               |           |             |           | 36          | 1         |

Laboratory experiments

heaped blocks

| case1 - cps   |           |             |           |             |           | case2 - cps   |           |             |           |             |           |
|---------------|-----------|-------------|-----------|-------------|-----------|---------------|-----------|-------------|-----------|-------------|-----------|
| laser-scanner |           | desk-split  |           | water-tank  |           | laser-scanner |           | desk-split  |           | water-tank  |           |
| diameter/cm   | passing/% | diameter/cm | passing/% | diameter/cm | passing/% | diameter/cm   | passing/% | diameter/cm | passing/% | diameter/cm | passing/% |
| 3             | 7.71E-04  | 3           | 0         | 5.32224     | 7.71E-04  | 4.2           | 5.29E-04  | 3           | 0         | 3.9365      | 6.91E-04  |
| 6.0804        | 0.00337   | 6           | 0.00409   | 7.98336     | 0.00337   | 6.1           | 0.00215   | 6           | 0.00409   | 4.97242     | 0.00208   |
| 8.51256       | 0.01051   | 9           | 0.02287   | 11.1767     | 0.01051   | 9.6           | 0.00847   | 9           | 0.02287   | 7.56222     | 0.00698   |
| 9.1206        | 0.01928   | 12          | 0.10153   | 11.97504    | 0.01928   | 10.2          | 0.01605   | 12          | 0.10153   | 8.18377     | 0.01319   |
| 9.6273        | 0.02961   | 15          | 0.34676   | 12.64032    | 0.02961   | 10.8          | 0.02505   | 15          | 0.34676   | 9.0125      | 0.02148   |
| 9.93132       | 0.04094   | 18          | 0.51584   | 13.03949    | 0.04094   | 11.4          | 0.03563   | 18          | 0.51584   | 9.63406     | 0.03161   |
| 10.94472      | 0.0561    | 21          | 0.58272   | 14.37005    | 0.0561    | 11.6          | 0.04678   | 21          | 0.58272   | 9.84124     | 0.0424    |
| 11.1474       | 0.07213   | 24          | 0.69416   | 14.63616    | 0.07213   | 11.7          | 0.05822   | 24          | 0.69416   | 10.04842    | 0.05389   |
| 11.35008      | 0.07904   | 27          | 1         | 14.90227    | 0.08904   | 11.9          | 0.07026   | 27          | 1         | 10.98075    | 0.06889   |
| 11.85678      | 0.08832   |             |           | 15.56755    | 0.10832   | 12.8          | 0.08524   |             |           | 11.39512    | 0.08565   |
| 12.56616      | 0.13128   |             |           | 16.49894    | 0.13128   | 13.4          | 0.10243   |             |           | 12.84541    | 0.13965   |
| 12.6675       | 0.15479   |             |           | 16.632      | 0.15479   | 14.6          | 0.12466   |             |           | 12.949      | 0.14424   |
| 13.07286      | 0.18063   |             |           | 17.16422    | 0.18063   | 14.7          | 0.14735   |             |           | 13.05259    | 0.15943   |
| 13.1742       | 0.20708   |             |           | 17.29728    | 0.20708   | 14.8          | 0.17051   |             |           | 13.67414    | 0.18838   |
| 13.37688      | 0.21477   |             |           | 17.56339    | 0.23477   | 15.6          | 0.19763   |             |           | 14.27414    | 0.22342   |
| 14.28894      | 0.28852   |             |           | 18.7609     | 0.26852   | 15.8          | 0.22581   |             |           | 14.71006    | 0.25039   |
| 14.39028      | 0.29299   |             |           | 18.89395    | 0.30299   | 16.8          | 0.25968   |             |           | 15.12443    | 0.29258   |
| 14.79564      | 0.33046   |             |           | 19.42618    | 0.34046   | 16.9          | 0.29416   |             |           | 15.33162    | 0.31339   |
| 15.201        | 0.35109   |             |           | 19.9584     | 0.38109   | 17.5          | 0.33244   |             |           | 15.74598    | 0.35761   |
| 15.30234      | 0.36254   |             |           | 20.09146    | 0.42254   | 18.6          | 0.37841   |             |           | 16.7819     | 0.42113   |
| 17.43048      | 0.51805   |             |           | 22.88563    | 0.4838    | 20.8          | 0.44269   |             |           | 18.23219    | 0.50978   |
| 18.2412       | 0.56402   |             |           | 23.95008    | 0.55402   | 21.7          | 0.51569   |             |           | 21.65073    | 0.73472   |
| 19.65996      | 0.64192   |             |           | 25.81286    | 0.64192   | 22.6          | 0.59815   |             |           | 24.86208    | 0.88877   |
| 23.3082       | 0.8484    |             |           | 30.60288    | 0.7884    | 29.8          | 0.78719   |             |           | 27          | 1         |
| 27            | 1         |             |           | 34.59456    | 1         | 31            | 1         |             |           |             |           |

Field experiments

| Filed1 - sur |           |             |           |               |           | Filed1 - cps |           |             |           |               |           |
|--------------|-----------|-------------|-----------|---------------|-----------|--------------|-----------|-------------|-----------|---------------|-----------|
| laser-point  |           | water-tank  |           | laser-scanner |           | laser-point  |           | water-tank  |           | laser-scanner |           |
| diameter/cm  | passing/% | diameter/cm | passing/% | diameter/cm   | passing/% | diameter/cm  | passing/% | diameter/cm | passing/% | diameter/cm   | passing/% |
| 12.4         | 6.15E-04  | 13.64       | 0.00195   | 12.4          | 0.00205   | 12.4         | 6.15E-04  | 13.64       | 0.00195   | 13.9624       | 0.00207   |
| 13.2         | 0.00136   | 15.24       | 0.00625   | 13            | 0.00507   | 13.2         | 0.00136   | 15.24       | 0.00625   | 14.638        | 0.00445   |
| 14.1         | 0.00226   | 20.45       | 0.01876   | 13.5          | 0.00878   | 14.1         | 0.00226   | 20.45       | 0.01876   | 15.201        | 0.00711   |
| 14.8         | 0.00331   | 25.82       | 0.04691   | 13.85         | 0.01302   | 14.8         | 0.00331   | 25.82       | 0.04691   | 15.5951       | 0.00999   |
| 14.8         | 0.00436   | 29.27       | 0.14072   | 14.275        | 0.01777   | 14.8         | 0.00436   | 29.27       | 0.14072   | 16.07365      | 0.01315   |
| 15.8         | 0.00563   | 33.73       | 0.35179   | 14.675        | 0.02297   | 15.8         | 0.00563   | 33.73       | 0.35179   | 16.52405      | 0.01657   |
| 15.9         | 0.00693   | 38.21       | 0.52768   | 17.26625      | 0.02851   | 15.9         | 0.00693   | 38.21       | 0.52768   | 19.4418       | 0.02215   |
| 16.3         | 0.00832   | 46.07       | 0.63322   | 17.64625      | 0.03443   | 16.3         | 0.00832   | 46.07       | 0.63322   | 19.86968      | 0.0281    |
| 16.8         | 0.00985   | 52.85       | 0.75986   | 18.02625      | 0.04074   | 16.8         | 0.00985   | 52.85       | 0.75986   | 20.29756      | 0.03445   |
| 16.9         | 0.01141   | 58.91       | 0.91183   | 18.02625      | 0.04704   | 16.9         | 0.01141   | 58.91       | 0.91183   | 20.29756      | 0.0408    |
| 16.9         | 0.01297   | 63.52       | 1         | 18.40625      | 0.05376   | 16.9         | 0.01297   | 63.52       | 1         | 20.72544      | 0.04756   |
| 17.4         | 0.01467   | --          | --        | 18.77675      | 0.06088   | 17.4         | 0.01467   | --          | --        | 21.14262      | 0.05473   |
| 17.4         | 0.01637   | --          | --        | 19.13775      | 0.06843   | 17.4         | 0.01637   | --          | --        | 21.54911      | 0.06233   |
| 17.5         | 0.0181    | --          | --        | 19.48925      | 0.0764    | 17.5         | 0.0181    | --          | --        | 21.9449       | 0.07035   |
| 17.5         | 0.01983   | --          | --        | 19.84075      | 0.08481   | 17.5         | 0.01983   | --          | --        | 22.34068      | 0.07882   |
| 17.6         | 0.02159   | --          | --        | 20.12575      | 0.09359   | 17.6         | 0.02159   | --          | --        | 22.66159      | 0.08765   |
| 18.6         | 0.02367   | --          | --        | 20.49625      | 0.10286   | 18.6         | 0.02367   | --          | --        | 23.07878      | 0.09698   |
| 19.3         | 0.02599   | --          | --        | 20.87625      | 0.11265   | 19.3         | 0.02599   | --          | --        | 23.50666      | 0.10684   |
| 19.7         | 0.02846   | --          | --        | 21.28         | 0.12303   | 19.7         | 0.02846   | --          | --        | 23.96128      | 0.11728   |
| 20.5         | 0.03124   | --          | --        | 21.66         | 0.13397   | 20.5         | 0.03124   | --          | --        | 24.38916      | 0.1283    |
| 20.6         | 0.03406   | --          | --        | 22.04         | 0.1455    | 20.6         | 0.03406   | --          | --        | 24.81704      | 0.1399    |
| 20.9         | 0.037     | --          | --        | 22.42         | 0.15763   | 20.9         | 0.037     | --          | --        | 25.24492      | 0.15211   |
| 21.3         | 0.04012   | --          | --        | 22.4295       | 0.16978   | 21.3         | 0.04012   | --          | --        | 25.25562      | 0.16434   |
| 21.4         | 0.04329   | --          | --        | 22.819        | 0.18257   | 21.4         | 0.04329   | --          | --        | 25.69419      | 0.17722   |
| 21.4         | 0.04645   | --          | --        | 23.2085       | 0.19603   | 21.4         | 0.04645   | --          | --        | 26.13277      | 0.19077   |
| 21.4         | 0.04961   | --          | --        | 23.5885       | 0.21017   | 21.4         | 0.04961   | --          | --        | 26.56065      | 0.20499   |
| 21.6         | 0.05287   | --          | --        | 23.978        | 0.22501   | 21.6         | 0.05287   | --          | --        | 26.99923      | 0.21993   |
| 22.68        | 0.05663   | --          | --        | 24.377        | 0.24061   | 22.68        | 0.05663   | --          | --        | 27.4485       | 0.23563   |
| 22.785       | 0.06045   | --          | --        | 24.776        | 0.25698   | 22.785       | 0.06045   | --          | --        | 27.89778      | 0.25211   |
| 22.995       | 0.06437   | --          | --        | 25.1655       | 0.27414   | 22.995       | 0.06437   | --          | --        | 28.33635      | 0.26938   |
| 22.995       | 0.0683    | --          | --        | 25.5455       | 0.29209   | 22.995       | 0.0683    | --          | --        | 28.76423      | 0.28745   |
| 22.995       | 0.07222   | --          | --        | 25.9255       | 0.31085   | 22.995       | 0.07222   | --          | --        | 29.19211      | 0.30634   |
| 23.205       | 0.07626   | --          | --        | 26.296        | 0.33043   | 23.205       | 0.07626   | --          | --        | 29.6093       | 0.32604   |
| 23.625       | 0.08051   | --          | --        | 26.676        | 0.35087   | 23.625       | 0.08051   | --          | --        | 30.03718      | 0.34661   |
| 23.625       | 0.08477   | --          | --        | 26.9382       | 0.37191   | 23.625       | 0.08477   | --          | --        | 30.33241      | 0.3678    |

|        |         |    |    |         |         |        |         |          |         |
|--------|---------|----|----|---------|---------|--------|---------|----------|---------|
| 23.625 | 0.08902 | -- | -- | 27.265  | 0.39374 | 23.625 | 0.08902 | 30.70039 | 0.38976 |
| 23.73  | 0.09334 | -- | -- | 27.5975 | 0.41637 | 23.73  | 0.09334 | 31.07478 | 0.41254 |
| 23.73  | 0.09765 | -- | -- | 27.93   | 0.43983 | 23.73  | 0.09765 | 31.44918 | 0.43616 |
| 23.835 | 0.10202 | -- | -- | 28.272  | 0.46416 | 23.835 | 0.10202 | 31.83427 | 0.46065 |
| 23.94  | 0.10645 | -- | -- | 28.614  | 0.48938 | 23.94  | 0.10645 | 32.21936 | 0.48604 |
| 23.94  | 0.11088 | -- | -- | 28.9655 | 0.51555 | 23.94  | 0.11088 | 32.61515 | 0.51237 |
| 23.94  | 0.11531 | -- | -- | 29.336  | 0.54273 | 23.94  | 0.11531 | 33.03234 | 0.53973 |
| 24.045 | 0.11979 | -- | -- | 29.725  | 0.57101 | 24.045 | 0.11979 | 33.47035 | 0.5682  |
| 24.255 | 0.1244  | -- | -- | 30.195  | 0.60065 | 24.255 | 0.1244  | 33.99957 | 0.59803 |
| 24.255 | 0.129   | -- | -- | 31.06   | 0.63291 | 24.255 | 0.129   | 34.97356 | 0.63051 |
| 24.57  | 0.13379 | -- | -- | 31.965  | 0.66808 | 24.57  | 0.13379 | 35.99259 | 0.6659  |
| 24.675 | 0.13864 | -- | -- | 33.025  | 0.70686 | 24.675 | 0.13864 | 37.18615 | 0.70494 |
| 24.675 | 0.14349 | -- | -- | 34.155  | 0.74976 | 24.675 | 0.14349 | 38.45853 | 0.74812 |
| 24.78  | 0.1484  | -- | -- | 35.58   | 0.79825 | 24.78  | 0.1484  | 40.06308 | 0.79693 |
| 24.78  | 0.15331 | -- | -- | 36.9888 | 0.85274 | 24.78  | 0.15331 | 41.64939 | 0.85178 |
| 24.78  | 0.15822 | -- | -- | 38.8296 | 0.91577 | 24.78  | 0.15822 | 43.72213 | 0.91522 |
| 24.78  | 0.16314 | -- | -- | 42.768  | 1       | 24.78  | 0.16314 | 48.15677 | 1       |
| 24.885 | 0.16811 | -- | -- | --      | --      | 24.885 | 0.16811 |          |         |
| 24.99  | 0.17315 | -- | -- | --      | --      | 24.99  | 0.17315 |          |         |
| 25.095 | 0.17825 | -- | -- | --      | --      | 25.095 | 0.17825 |          |         |
| 25.095 | 0.18335 | -- | -- | --      | --      | 25.095 | 0.18335 |          |         |
| 25.515 | 0.18871 | -- | -- | --      | --      | 25.515 | 0.18871 |          |         |
| 25.725 | 0.1942  | -- | -- | --      | --      | 25.725 | 0.1942  |          |         |
| 25.725 | 0.1997  | -- | -- | --      | --      | 25.725 | 0.1997  |          |         |
| 25.83  | 0.20526 | -- | -- | --      | --      | 25.83  | 0.20526 |          |         |
| 25.83  | 0.21082 | -- | -- | --      | --      | 25.83  | 0.21082 |          |         |
| 25.83  | 0.21639 | -- | -- | --      | --      | 25.83  | 0.21639 |          |         |
| 25.935 | 0.22202 | -- | -- | --      | --      | 25.935 | 0.22202 |          |         |
| 26.04  | 0.22772 | -- | -- | --      | --      | 26.04  | 0.22772 |          |         |
| 26.145 | 0.23349 | -- | -- | --      | --      | 26.145 | 0.23349 |          |         |
| 26.25  | 0.23932 | -- | -- | --      | --      | 26.25  | 0.23932 |          |         |
| 26.46  | 0.2453  | -- | -- | --      | --      | 26.46  | 0.2453  |          |         |
| 26.565 | 0.25135 | -- | -- | --      | --      | 26.565 | 0.25135 |          |         |
| 26.67  | 0.25748 | -- | -- | --      | --      | 26.67  | 0.25748 |          |         |
| 26.88  | 0.26375 | -- | -- | --      | --      | 26.88  | 0.26375 |          |         |
| 26.985 | 0.27009 | -- | -- | --      | --      | 26.985 | 0.27009 |          |         |
| 27.195 | 0.27658 | -- | -- | --      | --      | 27.195 | 0.27658 |          |         |
| 27.195 | 0.28307 | -- | -- | --      | --      | 27.195 | 0.28307 |          |         |
| 27.195 | 0.28956 | -- | -- | --      | --      | 27.195 | 0.28956 |          |         |

|        |         |    |    |    |    |
|--------|---------|----|----|----|----|
| 27.51  | 0.29628 | -- | -- | -- | -- |
| 27.615 | 0.30308 | -- | -- | -- | -- |
| 27.825 | 0.31003 | -- | -- | -- | -- |
| 28.035 | 0.31715 | -- | -- | -- | -- |
| 28.14  | 0.32434 | -- | -- | -- | -- |
| 28.14  | 0.33153 | -- | -- | -- | -- |
| 28.2   | 0.33877 | -- | -- | -- | -- |
| 28.3   | 0.34608 | -- | -- | -- | -- |
| 28.4   | 0.35348 | -- | -- | -- | -- |
| 28.6   | 0.36103 | -- | -- | -- | -- |
| 28.6   | 0.36858 | -- | -- | -- | -- |
| 28.665 | 0.37618 | -- | -- | -- | -- |
| 28.77  | 0.38387 | -- | -- | -- | -- |
| 28.77  | 0.39155 | -- | -- | -- | -- |
| 28.875 | 0.39932 | -- | -- | -- | -- |
| 29.1   | 0.40728 | -- | -- | -- | -- |
| 29.1   | 0.41523 | -- | -- | -- | -- |
| 29.505 | 0.42352 | -- | -- | -- | -- |
| 30.6   | 0.43277 | -- | -- | -- | -- |
| 31.7   | 0.44305 | -- | -- | -- | -- |
| 32     | 0.45363 | -- | -- | -- | -- |
| 32.5   | 0.46471 | -- | -- | -- | -- |
| 32.7   | 0.47599 | -- | -- | -- | -- |
| 32.7   | 0.48728 | -- | -- | -- | -- |
| 33.6   | 0.49952 | -- | -- | -- | -- |
| 33.8   | 0.51199 | -- | -- | -- | -- |
| 34     | 0.52467 | -- | -- | -- | -- |
| 34.1   | 0.53747 | -- | -- | -- | -- |
| 34.5   | 0.55073 | -- | -- | -- | -- |
| 34.6   | 0.5641  | -- | -- | -- | -- |
| 35.7   | 0.57878 | -- | -- | -- | -- |
| 36.5   | 0.59448 | -- | -- | -- | -- |
| 36.9   | 0.61069 | -- | -- | -- | -- |
| 36.9   | 0.62691 | -- | -- | -- | -- |
| 37.5   | 0.64393 | -- | -- | -- | -- |
| 38.1   | 0.66178 | -- | -- | -- | -- |
| 38.4   | 0.68006 | -- | -- | -- | -- |
| 38.6   | 0.69862 | -- | -- | -- | -- |
| 39.7   | 0.71882 | -- | -- | -- | -- |

|        |         |
|--------|---------|
| 27.51  | 0.29628 |
| 27.615 | 0.30308 |
| 27.825 | 0.31003 |
| 28.035 | 0.31715 |
| 28.14  | 0.32434 |
| 28.14  | 0.33153 |
| 28.2   | 0.33877 |
| 28.3   | 0.34608 |
| 28.4   | 0.35348 |
| 28.6   | 0.36103 |
| 28.6   | 0.36858 |
| 28.665 | 0.37618 |
| 28.77  | 0.38387 |
| 28.77  | 0.39155 |
| 28.875 | 0.39932 |
| 29.1   | 0.40728 |
| 29.1   | 0.41523 |
| 29.505 | 0.42352 |
| 30.6   | 0.43277 |
| 31.7   | 0.44305 |
| 32     | 0.45363 |
| 32.5   | 0.46471 |
| 32.7   | 0.47599 |
| 32.7   | 0.48728 |
| 33.6   | 0.49952 |
| 33.8   | 0.51199 |
| 34     | 0.52467 |
| 34.1   | 0.53747 |
| 34.5   | 0.55073 |
| 34.6   | 0.5641  |
| 35.7   | 0.57878 |
| 36.5   | 0.59448 |
| 36.9   | 0.61069 |
| 36.9   | 0.62691 |
| 37.5   | 0.64393 |
| 38.1   | 0.66178 |
| 38.4   | 0.68006 |
| 38.6   | 0.69862 |
| 39.7   | 0.71882 |

|      |         |    |    |    |    |
|------|---------|----|----|----|----|
| 40.7 | 0.74058 | -- | -- | -- | -- |
| 41.8 | 0.76415 | -- | -- | -- | -- |
| 42.6 | 0.7891  | -- | -- | -- | -- |
| 42.6 | 0.81406 | -- | -- | -- | -- |
| 43.9 | 0.84137 | -- | -- | -- | -- |
| 44.3 | 0.86943 | -- | -- | -- | -- |
| 44.9 | 0.89864 | -- | -- | -- | -- |
| 45.8 | 0.92965 | -- | -- | -- | -- |
| 46.9 | 0.96295 | -- | -- | -- | -- |
| 48.6 | 1       | -- | -- | -- | -- |

|      |         |
|------|---------|
| 40.7 | 0.74058 |
| 41.8 | 0.76415 |
| 42.6 | 0.7891  |
| 42.6 | 0.81406 |
| 43.9 | 0.84137 |
| 44.3 | 0.86943 |
| 44.9 | 0.89864 |
| 45.8 | 0.92965 |
| 46.9 | 0.96295 |
| 48.6 | 1       |

Field experiments

| Filed2-sur  |           |             |           |               |           | Filed2-cps  |           |             |           |               |           |
|-------------|-----------|-------------|-----------|---------------|-----------|-------------|-----------|-------------|-----------|---------------|-----------|
| laser-point |           | water-tank  |           | laser-scanner |           | laser-point |           | water-tank  |           | laser-scanner |           |
| diameter/cm | passing/% | diameter/cm | passing/% | diameter/cm   | passing/% | diameter/cm | passing/% | diameter/cm | passing/% | diameter/cm   | passing/% |
| 16.3        | 8.63E-04  | 14.5        | 0.00195   | 14.4          | 0.00164   | 16.3        | 8.63E-04  | 14.5        | 0.00195   | 16.3152       | 0.00164   |
| 16.8        | 0.00181   | 17.2        | 0.00625   | 14.4          | 0.00328   | 16.8        | 0.00181   | 17.2        | 0.00625   | 16.3152       | 0.00328   |
| 16.9        | 0.00277   | 23.2        | 0.01876   | 14.9          | 0.00509   | 16.9        | 0.00277   | 23.2        | 0.01876   | 16.8817       | 0.00509   |
| 17.2        | 0.00378   | 29.3        | 0.04691   | 15.3          | 0.00705   | 17.2        | 0.00378   | 29.3        | 0.04691   | 17.3349       | 0.00705   |
| 17.3        | 0.00482   | 33.2        | 0.07036   | 15.7          | 0.00918   | 17.3        | 0.00482   | 33.2        | 0.07036   | 17.7881       | 0.00918   |
| 17.4        | 0.00587   | 38.2        | 0.14072   | 16.2          | 0.01151   | 17.4        | 0.00587   | 38.2        | 0.14072   | 18.3546       | 0.01151   |
| 17.5        | 0.00694   | 43.3        | 0.28143   | 16.7          | 0.01406   | 17.5        | 0.00694   | 43.3        | 0.28143   | 18.9211       | 0.01406   |
| 17.6        | 0.00802   | 52.2        | 0.42214   | 17.1          | 0.01681   | 17.6        | 0.00802   | 52.2        | 0.42214   | 19.3743       | 0.01681   |
| 17.8        | 0.00915   | 59.9        | 0.52768   | 17.5          | 0.01975   | 17.8        | 0.00915   | 59.9        | 0.52768   | 19.8275       | 0.01975   |
| 18.6        | 0.01043   | 66.8        | 0.79152   | 17.9          | 0.02289   | 18.6        | 0.01043   | 66.8        | 0.79152   | 20.2807       | 0.02289   |
| 19.3        | 0.01186   | 72.3        | 0.87067   | 18.3          | 0.02625   | 19.3        | 0.01186   | 72.3        | 0.87067   | 20.7339       | 0.02625   |
| 19.7        | 0.01339   | 80.4        | 0.91421   | 18.7          | 0.02984   | 19.7        | 0.01339   | 80.4        | 0.91421   | 21.1871       | 0.02984   |
| 20.5        | 0.0151    | 86.8        | 0.95992   | 19.1          | 0.03366   | 20.5        | 0.0151    | 86.8        | 0.95992   | 21.6403       | 0.03366   |
| 20.6        | 0.01684   | 94.2        | 1         | 19.5          | 0.03773   | 20.6        | 0.01684   | 94.2        | 1         | 22.0935       | 0.03773   |
| 20.9        | 0.01866   |             |           | 19.9          | 0.04205   | 20.9        | 0.01866   | --          | --        | 22.5467       | 0.04205   |
| 21.4        | 0.02062   |             |           | 20.29756      | 0.04664   | 21.4        | 0.02062   | --          | --        | 22.99713      | 0.04664   |
| 21.5        | 0.0226    |             |           | 20.7          | 0.0515    | 21.5        | 0.0226    | --          | --        | 23.4531       | 0.0515    |
| 21.6        | 0.02461   |             |           | 21.1          | 0.05666   | 21.6        | 0.02461   | --          | --        | 23.9063       | 0.05666   |
| 22.4        | 0.02685   |             |           | 21.4          | 0.06203   | 22.4        | 0.02685   | --          | --        | 24.2462       | 0.06203   |
| 22.68       | 0.02917   |             |           | 21.8          | 0.06772   | 22.68       | 0.02917   | --          | --        | 24.6994       | 0.06772   |
| 22.785      | 0.03153   |             |           | 22.2          | 0.07372   | 22.785      | 0.03153   | --          | --        | 25.1526       | 0.07372   |
| 22.995      | 0.03395   |             |           | 22.6          | 0.08005   | 22.995      | 0.03395   | --          | --        | 25.6058       | 0.08005   |
| 23.5        | 0.03654   |             |           | 23            | 0.08672   | 23.5        | 0.03654   | --          | --        | 26.059        | 0.08672   |
| 23.625      | 0.03917   |             |           | 23.4          | 0.09375   | 23.625      | 0.03917   | --          | --        | 26.5122       | 0.09375   |
| 23.8        | 0.04186   |             |           | 23.8          | 0.10115   | 23.8        | 0.04186   | --          | --        | 26.9654       | 0.10115   |
| 23.835      | 0.04456   |             |           | 24.2          | 0.10892   | 23.835      | 0.04456   | --          | --        | 27.4186       | 0.10892   |
| 23.94       | 0.04729   |             |           | 24.5          | 0.11699   | 23.94       | 0.04729   | --          | --        | 27.7585       | 0.11699   |
| 24.045      | 0.05006   |             |           | 24.9          | 0.12545   | 24.045      | 0.05006   | --          | --        | 28.2117       | 0.12545   |
| 24.1        | 0.05285   |             |           | 25.3          | 0.13434   | 24.1        | 0.05285   | --          | --        | 28.6649       | 0.13434   |
| 24.255      | 0.0557    |             |           | 25.6          | 0.14354   | 24.255      | 0.0557    | --          | --        | 29.0048       | 0.14354   |
| 24.6        | 0.05866   |             |           | 26            | 0.15318   | 24.6        | 0.05866   | --          | --        | 29.458        | 0.15318   |
| 24.675      | 0.06166   |             |           | 26.3          | 0.16316   | 24.675      | 0.06166   | --          | --        | 29.7979       | 0.16316   |
| 24.78       | 0.06469   |             |           | 26.7          | 0.1736    | 24.78       | 0.06469   | --          | --        | 30.2511       | 0.1736    |
| 24.78       | 0.06772   |             |           | 27.1          | 0.18452   | 24.78       | 0.06772   | --          | --        | 30.7043       | 0.18452   |
| 24.885      | 0.0708    |             |           | 27.5          | 0.19592   | 24.885      | 0.0708    | --          | --        | 31.1575       | 0.19592   |



|        |         |          |         |
|--------|---------|----------|---------|
| 24.99  | 0.07391 | 27.8     | 0.20771 |
| 25.095 | 0.07706 | 28.2     | 0.22001 |
| 25.515 | 0.08037 | 28.5     | 0.23271 |
| 25.6   | 0.08371 | 28.9     | 0.24595 |
| 25.725 | 0.0871  | 29.3     | 0.25974 |
| 25.83  | 0.09054 | 29.8     | 0.27426 |
| 25.83  | 0.09397 | 30.33241 | 0.28957 |
| 25.935 | 0.09745 | 30.70039 | 0.30544 |
| 26.04  | 0.10097 | 31.07478 | 0.3219  |
| 26.145 | 0.10453 | 31.44918 | 0.33896 |
| 26.2   | 0.10812 | 31.83427 | 0.35666 |
| 26.25  | 0.11172 | 32.21936 | 0.375   |
| 26.46  | 0.11542 | 32.61515 | 0.39403 |
| 26.565 | 0.11915 | 33.03234 | 0.4138  |
| 26.67  | 0.12293 | 33.47035 | 0.43437 |
| 26.7   | 0.12673 | 33.99957 | 0.45593 |
| 26.8   | 0.13056 | 34.6     | 0.47865 |
| 26.88  | 0.13444 | 35.2     | 0.50257 |
| 26.985 | 0.13835 | 35.7     | 0.52753 |
| 27.195 | 0.14236 | 36.4     | 0.55398 |
| 27.195 | 0.14637 | 37.2     | 0.58222 |
| 27.195 | 0.15038 | 38       | 0.61232 |
| 27.3   | 0.15444 | 38.9     | 0.64461 |
| 27.615 | 0.15863 | 39.8     | 0.67919 |
| 28.035 | 0.16302 | 40.8     | 0.71644 |
| 28.1   | 0.16745 | 42       | 0.75708 |
| 28.2   | 0.17192 | 43.5     | 0.80223 |
| 28.6   | 0.17658 | 45.5     | 0.8539  |
| 28.665 | 0.18128 | 48.5     | 0.91648 |
| 28.77  | 0.18602 | 53.4     | 1       |
| 28.77  | 0.19077 |          |         |
| 29.1   | 0.19568 |          |         |
| 29.2   | 0.20064 |          |         |
| 29.505 | 0.20576 |          |         |
| 29.7   | 0.21098 |          |         |
| 30.6   | 0.2167  |          |         |
| 31.2   | 0.22275 |          |         |
| 31.6   | 0.22904 |          |         |
| 31.7   | 0.23539 |          |         |

|        |         |    |    |          |         |
|--------|---------|----|----|----------|---------|
| 24.99  | 0.07391 | -- | -- | 31.4974  | 0.20771 |
| 25.095 | 0.07706 | -- | -- | 31.9506  | 0.22001 |
| 25.515 | 0.08037 | -- | -- | 32.2905  | 0.23271 |
| 25.6   | 0.08371 | -- | -- | 32.7437  | 0.24595 |
| 25.725 | 0.0871  | -- | -- | 33.1969  | 0.25974 |
| 25.83  | 0.09054 | -- | -- | 33.7634  | 0.27426 |
| 25.83  | 0.09397 | -- | -- | 34.36662 | 0.28957 |
| 25.935 | 0.09745 | -- | -- | 34.78354 | 0.30544 |
| 26.04  | 0.10097 | -- | -- | 35.20773 | 0.3219  |
| 26.145 | 0.10453 | -- | -- | 35.63192 | 0.33896 |
| 26.2   | 0.10812 | -- | -- | 36.06823 | 0.35666 |
| 26.25  | 0.11172 | -- | -- | 36.50454 | 0.375   |
| 26.46  | 0.11542 | -- | -- | 36.95297 | 0.39403 |
| 26.565 | 0.11915 | -- | -- | 37.42564 | 0.4138  |
| 26.67  | 0.12293 | -- | -- | 37.92191 | 0.43437 |
| 26.7   | 0.12673 | -- | -- | 38.52151 | 0.45593 |
| 26.8   | 0.13056 | -- | -- | 39.2018  | 0.47865 |
| 26.88  | 0.13444 | -- | -- | 39.8816  | 0.50257 |
| 26.985 | 0.13835 | -- | -- | 40.4481  | 0.52753 |
| 27.195 | 0.14236 | -- | -- | 41.2412  | 0.55398 |
| 27.195 | 0.14637 | -- | -- | 42.1476  | 0.58222 |
| 27.195 | 0.15038 | -- | -- | 43.054   | 0.61232 |
| 27.3   | 0.15444 | -- | -- | 44.0737  | 0.64461 |
| 27.615 | 0.15863 | -- | -- | 45.0934  | 0.67919 |
| 28.035 | 0.16302 | -- | -- | 46.2264  | 0.71644 |
| 28.1   | 0.16745 | -- | -- | 47.586   | 0.75708 |
| 28.2   | 0.17192 | -- | -- | 49.2855  | 0.80223 |
| 28.6   | 0.17658 | -- | -- | 51.5515  | 0.8539  |
| 28.665 | 0.18128 | -- | -- | 54.9505  | 0.91648 |
| 28.77  | 0.18602 | -- | -- | 60.5022  | 1       |
| 28.77  | 0.19077 | -- | -- | --       | --      |
| 29.1   | 0.19568 | -- | -- | --       | --      |
| 29.2   | 0.20064 | -- | -- | --       | --      |
| 29.505 | 0.20576 | -- | -- | --       | --      |
| 29.7   | 0.21098 | -- | -- | --       | --      |
| 30.6   | 0.2167  | -- | -- | --       | --      |
| 31.2   | 0.22275 | -- | -- | --       | --      |
| 31.6   | 0.22904 | -- | -- | --       | --      |
| 31.7   | 0.23539 | -- | -- | --       | --      |

|      |         |
|------|---------|
| 32   | 0.24192 |
| 32.5 | 0.24876 |
| 32.5 | 0.2556  |
| 32.7 | 0.26257 |
| 32.7 | 0.26954 |
| 33.4 | 0.27697 |
| 33.6 | 0.28453 |
| 33.8 | 0.29223 |
| 33.8 | 0.29992 |
| 34   | 0.30776 |
| 34.1 | 0.31566 |
| 34.5 | 0.32385 |
| 34.5 | 0.33203 |
| 34.6 | 0.34029 |
| 35.2 | 0.34898 |
| 35.7 | 0.35805 |
| 35.8 | 0.3672  |
| 36.4 | 0.37681 |
| 36.5 | 0.3865  |
| 36.9 | 0.39652 |
| 36.9 | 0.40653 |
| 37.1 | 0.41671 |
| 37.5 | 0.42722 |
| 38.1 | 0.43825 |
| 38.2 | 0.44936 |
| 38.4 | 0.46064 |
| 38.6 | 0.47211 |
| 39.4 | 0.4843  |
| 39.5 | 0.49658 |
| 39.7 | 0.50905 |
| 40.7 | 0.52249 |
| 41.8 | 0.53705 |
| 42.6 | 0.55246 |
| 43.9 | 0.56932 |
| 44.3 | 0.58665 |
| 45.3 | 0.60518 |
| 45.8 | 0.62433 |
| 46.3 | 0.64411 |
| 46.9 | 0.66468 |

|      |         |    |    |    |    |
|------|---------|----|----|----|----|
| 32   | 0.24192 | -- | -- | -- | -- |
| 32.5 | 0.24876 | -- | -- | -- | -- |
| 32.5 | 0.2556  | -- | -- | -- | -- |
| 32.7 | 0.26257 | -- | -- | -- | -- |
| 32.7 | 0.26954 | -- | -- | -- | -- |
| 33.4 | 0.27697 | -- | -- | -- | -- |
| 33.6 | 0.28453 | -- | -- | -- | -- |
| 33.8 | 0.29223 | -- | -- | -- | -- |
| 33.8 | 0.29992 | -- | -- | -- | -- |
| 34   | 0.30776 | -- | -- | -- | -- |
| 34.1 | 0.31566 | -- | -- | -- | -- |
| 34.5 | 0.32385 | -- | -- | -- | -- |
| 34.5 | 0.33203 | -- | -- | -- | -- |
| 34.6 | 0.34029 | -- | -- | -- | -- |
| 35.2 | 0.34898 | -- | -- | -- | -- |
| 35.7 | 0.35805 | -- | -- | -- | -- |
| 35.8 | 0.3672  | -- | -- | -- | -- |
| 36.4 | 0.37681 | -- | -- | -- | -- |
| 36.5 | 0.3865  | -- | -- | -- | -- |
| 36.9 | 0.39652 | -- | -- | -- | -- |
| 36.9 | 0.40653 | -- | -- | -- | -- |
| 37.1 | 0.41671 | -- | -- | -- | -- |
| 37.5 | 0.42722 | -- | -- | -- | -- |
| 38.1 | 0.43825 | -- | -- | -- | -- |
| 38.2 | 0.44936 | -- | -- | -- | -- |
| 38.4 | 0.46064 | -- | -- | -- | -- |
| 38.6 | 0.47211 | -- | -- | -- | -- |
| 39.4 | 0.4843  | -- | -- | -- | -- |
| 39.5 | 0.49658 | -- | -- | -- | -- |
| 39.7 | 0.50905 | -- | -- | -- | -- |
| 40.7 | 0.52249 | -- | -- | -- | -- |
| 41.8 | 0.53705 | -- | -- | -- | -- |
| 42.6 | 0.55246 | -- | -- | -- | -- |
| 43.9 | 0.56932 | -- | -- | -- | -- |
| 44.3 | 0.58665 | -- | -- | -- | -- |
| 45.3 | 0.60518 | -- | -- | -- | -- |
| 45.8 | 0.62433 | -- | -- | -- | -- |
| 46.3 | 0.64411 | -- | -- | -- | -- |
| 46.9 | 0.66468 | -- | -- | -- | -- |

|      |         |
|------|---------|
| 47.8 | 0.68645 |
| 48.4 | 0.70904 |
| 49.2 | 0.73278 |
| 50.1 | 0.75785 |
| 51   | 0.78429 |
| 52.1 | 0.81248 |
| 53.6 | 0.84317 |
| 55.8 | 0.8778  |
| 57.2 | 0.91511 |
| 58.7 | 0.95542 |
| 60.7 | 1       |

|      |         |    |    |    |    |
|------|---------|----|----|----|----|
| 47.8 | 0.68645 | -- | -- | -- | -- |
| 48.4 | 0.70904 | -- | -- | -- | -- |
| 49.2 | 0.73278 | -- | -- | -- | -- |
| 50.1 | 0.75785 | -- | -- | -- | -- |
| 51   | 0.78429 | -- | -- | -- | -- |
| 52.1 | 0.81248 | -- | -- | -- | -- |
| 53.6 | 0.84317 | -- | -- | -- | -- |
| 55.8 | 0.8778  | -- | -- | -- | -- |
| 57.2 | 0.91511 | -- | -- | -- | -- |
| 58.7 | 0.95542 | -- | -- | -- | -- |
| 60.7 | 1       | -- | -- | -- | -- |
